# Supplementary material for: The genome-wide effects of ionizing radiation on mutation induction in the mammalian germline
Source: PubMed Central journal article supplement (PMC4389250; doi:10.1038/ncomms7684), 2015-03-26
Supplement: ncomms7684-s1.pdf [file ncomms7684-s1.pdf]

Supplementary Fig. 1

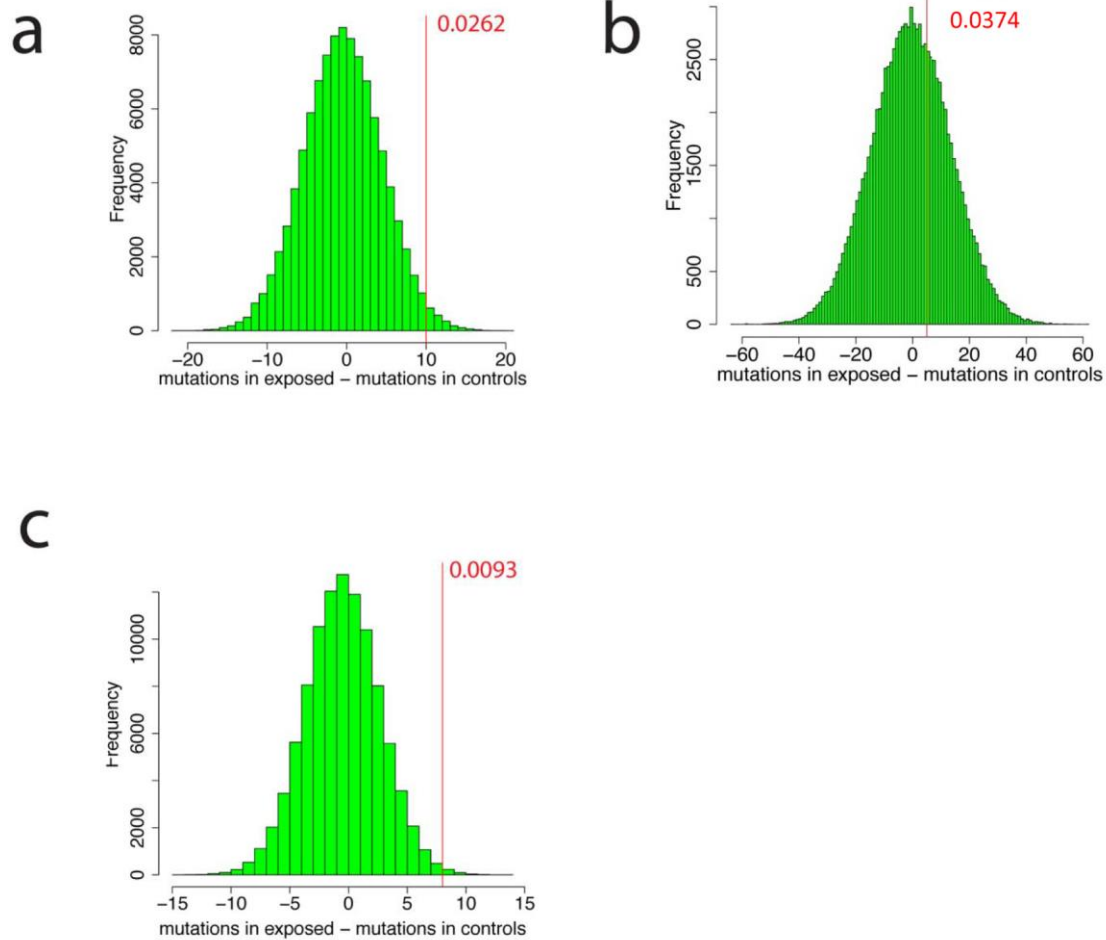

**Supplementary Figure 1 |** Histograms showing Poisson simulations of the null distribution of the difference in numbers of *de novo* mutations in exposed and control populations of mice. The red line shows the true difference between numbers of mutations and the chances of this occurring over 100,000 simulations, in indels (a), SNVs (b), and multisite (c) *de novo* mutations.

**Supplementary Table 1 | Spectrum of *de novo* CNV mutations.**

| ID                       | Chrom | Start       | End         | Size       | Sex* | Type | Origin | Comment <sup>†</sup> |
|--------------------------|-------|-------------|-------------|------------|------|------|--------|----------------------|
| Control                  |       |             |             |            |      |      |        |                      |
| CNVc1                    | 11    | 25,905,881  | 25,910,330  | 4,449      | ♂    | del  | ?      | unique               |
| Irradiated, post-meiotic |       |             |             |            |      |      |        |                      |
| CNVa8                    | 4     | 21,333,414  | 21,348,654  | 15,240     | -    | del  | ?      | mosaic (3)           |
| CNVa1                    | 1     | 7,897,894   | 11,887,864  | 3,989,970  | ♂    | del  | pat    | unique               |
| CNVa13                   | 5     | 65,687,317  | 65,693,004  | 5,687      | ♀    | del  | ?      | unique               |
| CNVa7                    | 8     | 18,705,709  | 18,764,523  | 58,814     | ♀    | del  | pat    | unique               |
| CNVab12 <sup>‡</sup>     | 19    | 57,189,173  | 57,202,810  | 13,637     | -    | del  | pat    | mosaic (2)           |
| CNVa36                   | 16    | 25,331,300  | 25,371,606  | 40,306     | ♂    | dupl | ?      | unique               |
| CNVa15                   | 5     | 78,795,493  | 89,129,706  | 10,334,213 | ♂    | del  | pat    | unique               |
| Irradiated, pre-meiotic  |       |             |             |            |      |      |        |                      |
| CNVb35                   | 13    | 76,293,133  | 79,528,307  | 3,235,174  | ♀    | del  | pat    | unique               |
| CNVb54                   | 12    | 100,826,223 | 100,830,676 | 4,453      | -    | dupl | pat    | mosaic (2)           |
| CNVb14                   | 16    | 40,041,302  | 40,045,796  | 4,494      | ♂    | del  | pat    | unique               |
| CNVb16                   | 11    | 41,634,027  | 41,638,541  | 4,514      | ♂    | dupl | ?      | unique               |
| CNVb32                   | 1     | 72,273,027  | 72,282,152  | 9,125      | ♂    | del  | ?      | unique               |
| CNVb6                    | 14    | 15,306,083  | 17,774,817  | 2,468,734  | ♀    | del  | pat    | unique               |
| CNVb28                   | 15    | 61,779,112  | 61,788,603  | 9,491      | ♀    | del  | pat    | unique               |
| CNVb31                   | 16    | 72,137,165  | 72,166,552  | 29,387     | ♂    | del  | pat    | unique               |
| CNVb18                   | 4     | 48,968,827  | 49,017,041  | 48,214     | ♂    | del  | pat    | unique               |
| CNVb57                   | 14    | 114,841,926 | 116,324,868 | 1,482,942  | ♀    | del  | pat    | unique               |
| CNVb15                   | 16    | 41,628,748  | 41,695,564  | 66,816     | ♀    | del  | pat    | mosaic (2)           |
| CNVab12 <sup>‡</sup>     | 19    | 57,189,173  | 57,202,810  | 13,637     | -    | del  | pat    | mosaic (3)           |

\*Sex of offspring

<sup>†</sup>The number of offspring sharing mosaic mutations is given in brackets.

<sup>‡</sup>The same *de novo* mosaic mutation detected in the offspring of one irradiated male.

Supplementary Table 2 | *De novo* mutations detected by the next generation sequencing.

| Group, ID         | Indel <sup>*</sup> | SNV <sup>*</sup> | Multisite | False positive | Inherited  | NA <sup>†</sup> |
|-------------------|--------------------|------------------|-----------|----------------|------------|-----------------|
| <b>Control</b>    |                    |                  |           |                |            |                 |
| 2_3_1             | 0                  | 19               | 0         | 64             | 93         | 6               |
| 2_3_2             | 1                  | 15               | 0         | 75             | 90         | 5               |
| 2_3_3             | 3                  | 22               | 0         | 91             | 49         | 8               |
| 3_5_1             | 1                  | 17               | 0         | 101            | 49         | 4               |
| 3_5_4             | 0                  | 13               | 0         | 83             | 66         | 13              |
| 3_5_8             | 2                  | 9                | 1         | 66             | 68         | 6               |
| <b>Total</b>      | <b>7</b>           | <b>95</b>        | <b>1</b>  | <b>480</b>     | <b>415</b> | <b>42</b>       |
| <b>Irradiated</b> |                    |                  |           |                |            |                 |
| 11_21_1           | 5                  | 18               | 1         | 76             | 78         | 4               |
| 11_21_2           | 3                  | 21               | 1         | 64             | 60         | 11              |
| 11_21_3           | 2                  | 14               | 0         | 56             | 82         | 6               |
| 13_25_1           | 1                  | 24               | 3         | 57             | 89         | 12              |
| 13_25_2           | 2                  | 19               | 2         | 66             | 75         | 2               |
| 13_23_3           | 4                  | 11               | 2         | 62             | 73         | 1               |
| <b>Total</b>      | <b>17</b>          | <b>107</b>       | <b>9</b>  | <b>381</b>     | <b>457</b> | <b>36</b>       |

<sup>\*</sup>Multisite mutations counted as one mutational event.

<sup>†</sup>Including primer design and validation fail.

**Supplementary Table 3 | Primers used for de novo CNV validation by qPCR.**

| <b>Name</b>  | <b>Primers (forward/reverse)</b>                | <b>Chrom.</b> | <b>Start</b> | <b>End</b> |
|--------------|-------------------------------------------------|---------------|--------------|------------|
| <i>Tfrc1</i> | GCACTAGATTGGATACCTA<br>ACGTCATGGGTAAGTTTA       | 16            | 32,626,657   | 32,626,771 |
| CNVc1        | GGCTTTCCATTCTGAATC<br>TGGTGTTACTTAGGATCA        | 11            | 25,806,686   | 25,806,827 |
| CNVa8        | CCAGAACTGATCAAAAAGAA<br>CTGGTAAGTAGAACACAAC     | 4             | 21,267,392   | 21,267,496 |
| CNVa2        |                                                 |               |              |            |
| -Region 1    | CCTACTCCAAGAAGACAA<br>GGATCAGAAAAGTGGAAATG      | 1             | 9,524,462    | 9,524,577  |
| -Region 2    | GGCTGGTTATTGGAAAAG<br>AGGCTTATTAACCTTGATTTTC    | 1             | 11,582,349   | 11,582,448 |
| CNVa13_1     | GTAGGCAGGTATTTGAAG<br>AGCACAAAAGTAAATTCACA      | 5             | 66,079,681   | 66,079,790 |
| CNVa7        | TCCTCTGGCTCTATGATA<br>CAGTCTGTTTATACTTTTACATG   | 8             | 18,706,670   | 18,706,801 |
| CNVa15       |                                                 |               |              |            |
| -Region 1    | CCACACAATACACACAATA<br>CCCACTTTTCTAGTTGATG      | 5             | 79,224,965   | 79,225,052 |
| -Region 2    | GTGCTTTGAGCTTTACTG<br>GGACACTTCATACTCTTCA       | 5             | 79,000,502   | 79,000,600 |
| -Region 3    | AGGGAAATACTTTTCAACTC<br>TGGGTAAGTGAATAATATC     | 5             | 79,724,211   | 79,724,302 |
| -Region 4    | GCCAATAAGTGAAGTACTGATC<br>CATGCTCCTGTCTTTATG    | 5             | 80,340,545   | 80,340,644 |
| CNVb35       |                                                 |               |              |            |
| -Region 1    | CTCCATCACAGCAAGAATA<br>CATCCATGACACTGTCTTA      | 13            | 76,431,209   | 76,431,357 |
| -Region 2    | GCTTGTAACAATATGTGTG<br>GCTGCTTTTGATGATAGTA      | 13            | 77,629,724   | 77,629,853 |
| CNVb14       | GGACTCATAGGCATTCTA<br>GAGTGTCTATATCTGTCTGA      | 16            | 40,042,318   | 40,042,435 |
| CNVb16       | GAGAGTAACATGATCATTTACA<br>GCTGATTAGTTTCAATCTGTA | 11            | 41,448,496   | 41,448,578 |
| CNVb32       | CTCAGTTACTTGGCAGAA<br>AGGTGTACACTTTTGTCA        | 1             | 72,320,313   | 72,320,387 |
| CNVb6        |                                                 |               |              |            |
| -Region 1    | CCTTCAGAATTACGTCATTA<br>CCCTCATAGAGTCTCTAG      | 14            | 16,138,747   | 16,138,829 |
| -Region 2    | CCTCAGCTTCTAGAGATTA<br>CTCAGAAAGGTTTCATTTAGTA   | 14            | 16,278,955   | 16,279,040 |
| CNVb28       | GAGGACACAGTATCTTCTA<br>CCCTTTCTTCTTGCTATG       | 15            | 61,611,119   | 61,611,240 |

**Supplementary Table 4 | Candidate sites chosen for validation.**

| <b>ID</b>         | <b>Indel candidates</b> | <b>SNV candidates</b> | <b>Additional indel candidates*</b> | <b>Trio <i>de novo</i> candidates</b> | <b>Total</b> |
|-------------------|-------------------------|-----------------------|-------------------------------------|---------------------------------------|--------------|
| <b>Controls</b>   |                         |                       |                                     |                                       |              |
| 2_3_1             | 45                      | 129                   | 5                                   | 4                                     | <b>183</b>   |
| 2_3_2             | 47                      | 136                   | 2                                   | 0                                     | <b>185</b>   |
| 2_3_3             | 39                      | 129                   | 6                                   | 0                                     | <b>174</b>   |
| 3_5_1             | 23                      | 143                   | 4                                   | 3                                     | <b>173</b>   |
| 3_5_4             | 14                      | 158                   | 3                                   | 0                                     | <b>175</b>   |
| 3_5_8             | 18                      | 131                   | 3                                   | 1                                     | <b>153</b>   |
| <b>Irradiated</b> |                         |                       |                                     |                                       |              |
| 11_21_1           | 24                      | 148                   | 5                                   | 3                                     | <b>180</b>   |
| 11_21_2           | 26                      | 130                   | 4                                   | 0                                     | <b>160</b>   |
| 11_21_3           | 22                      | 135                   | 2                                   | 1                                     | <b>160</b>   |
| 13_25_1           | 27                      | 156                   | 5                                   | 0                                     | <b>188</b>   |
| 13_25_2           | 37                      | 123                   | 4                                   | 0                                     | <b>164</b>   |
| 13_25_3           | 23                      | 126                   | 3                                   | 1                                     | <b>153</b>   |
| <b>Total</b>      | <b>345</b>              | <b>1644</b>           | <b>46</b>                           | <b>13</b>                             | <b>2048</b>  |

\*Using lowered posterior probability threshold.

Supplementary Table 5 | Validation outcome.

| ID                | For validation | Passed primer design | Passed validation (LRT>5) | Inherited | False positive | DNM | Adjusted DNM* |
|-------------------|----------------|----------------------|---------------------------|-----------|----------------|-----|---------------|
| <b>Controls</b>   |                |                      |                           |           |                |     |               |
| 2_3_1             | 183            | 183                  | 177                       | 93        | 64             | 19  | 19            |
| 2_3_2             | 185            | 183                  | 180                       | 90        | 75             | 16  | 16            |
| 2_3_3             | 174            | 173                  | 166                       | 49        | 91             | 25  | 25            |
| 3_5_1             | 173            | 173                  | 167                       | 49        | 101            | 17  | 17            |
| 3_5_4             | 175            | 175                  | 162                       | 66        | 83             | 13  | 13            |
| 3_5_8             | 153            | 151                  | 147                       | 68        | 66             | 13  | 11            |
| <b>Irradiated</b> |                |                      |                           |           |                |     |               |
| 11_21_1           | 180            | 178                  | 176                       | 78        | 76             | 22  | 23            |
| 11_21_2           | 160            | 158                  | 149                       | 60        | 64             | 25  | 24            |
| 11_21_3           | 160            | 158                  | 154                       | 82        | 56             | 16  | 16            |
| 13_25_1           | 188            | 187                  | 175                       | 89        | 57             | 29  | 25            |
| 13_25_2           | 164            | 163                  | 162                       | 75        | 66             | 21  | 21            |
| 13_25_3           | 153            | 152                  | 152                       | 73        | 62             | 17  | 15            |
| <b>Total</b>      | 2048           | 2034                 | 1967                      | 872       | 861            | 234 | 225           |

\* Multisite variants counted as one mutational event, includes indels.
